# Supplementary material for: Predicting the Transition From Suicidal Ideation to Suicide Attempt Among Sexual and Gender Minority Youths
Source: Atypon-hosted journal article supplement (doi:10.1176/appi.ps.202000497), 2021-08-04
Supplement: appi.ps.202000497.ds001.pdf [file appi.ps.202000497.ds001.pdf]

Supplemental Table 1. Hazard ratios (95% CIs) for multivariate associations of baseline characteristics with suicide attempt at follow-up, with the CAT-DI as a measure of depressive symptoms.

|                                | Sample            | Ideators                      | Non-Ideators      |
|--------------------------------|-------------------|-------------------------------|-------------------|
|                                | N = 1,006         | n = 258                       | n = 748           |
| CAT-SS <sup>a</sup>            | 1.37 (1.05-1.79)* | 1.33 (0.97-1.83) <sup>^</sup> | 1.11 (0.65-1.88)  |
| CAT-DI <sup>b</sup>            | 0.91 (0.72-1.15)  | 0.89 (0.67-1.17)              | 0.98 (0.63-1.50)  |
| Heavy alcohol use <sup>c</sup> | 1.25 (0.55-2.83)  | 1.52 (0.59-3.95)              | 0.46 (0.06-3.56)  |
| Victimization                  | 2.39 (1.19-4.81)* | 2.59 (1.15-5.84)*             | 1.51 (0.24-9.34)  |
| Social Support                 | 0.88 (0.67-1.15)  | 1.17 (0.81-1.71)              | 0.67 (0.46-0.98)* |

<sup>a</sup>Computerized Adaptive Test – Suicide Scale (CAT-SS), range: 1-10, with higher scores indicating more severe suicidality.

<sup>b</sup>Computerized Adaptive Test – Depression Inventory (CAT-DI), range: 1-10, with higher scores indicating more severe depressive symptoms.

<sup>c</sup>Alcohol Use Disorders Identification Test (AUDIT) score of 8 or above. Reference category was a score of less than 8.

<sup>^</sup> $p < .10$ . \* $p < .05$ . \*\* $p < .01$ .

Supplemental Table 2. Hazard ratios (95% CIs) for multivariate associations of baseline characteristics with suicide attempt at follow-up, with the PROMIS-8 as a measure of depressive symptoms.

|                                | Sample                        | Ideators                      | Non-Ideators                  |
|--------------------------------|-------------------------------|-------------------------------|-------------------------------|
|                                | N = 1,006                     | n = 258                       | n = 748                       |
| CAT-SS <sup>a</sup>            | 1.28 (0.98-1.69) <sup>^</sup> | 1.38 (0.99-1.91) <sup>^</sup> | 0.91 (0.56-1.45)              |
| PROMIS-8 <sup>b</sup>          | 0.99 (0.93-1.06)              | 0.96 (0.89-1.04)              | 1.06 (0.95-1.18)              |
| Heavy alcohol use <sup>c</sup> | 1.23 (0.54-2.79)              | 1.55 (0.59-4.06)              | 0.44 (0.06-3.42)              |
| Victimization                  | 2.36 (1.15-4.82) <sup>*</sup> | 2.58 (1.13-5.90) <sup>*</sup> | 1.21 (0.18-8.10)              |
| Social Support                 | 0.87 (0.67-1.14)              | 1.15 (0.79-1.69)              | 0.65 (0.44-0.96) <sup>*</sup> |

<sup>a</sup>Computerized Adaptive Test – Suicide Scale (CAT-SS), range: 1-10, with higher scores indicating more severe suicidality.

<sup>b</sup>Patient-Reported Outcomes Measurement Information System (PROMIS) Depression–Short Form 8A.

<sup>c</sup>Alcohol Use Disorders Identification Test (AUDIT) score of 8 or above. Reference category was a score of less than 8.

<sup>^</sup> $p < .10$ . <sup>\*</sup> $p < .05$ . <sup>\*\*</sup> $p < .01$ .
